# Supplementary material
Source: Springer Nature journal article supplement (https://www.springermedizin.de/resource/supplementary/12874_2011_739_MOESM1_ESM.pdf/9432864)
Supplement: MOESM1 [file 9432864]

References included by  
search terms (n=2089)

References excluded after  
screening abstracts (n=1778)

Articles potentially meet  
including criteria (RCT, fall  
prevention,  
participants>65yrs.) (n=311)

Rejected (n=270)

- No definition of injurious falls (n=187)
- No results on injurious falls in outcomes (n=51)
- Not meeting other inclusion criteria (n=32)

Articles finally included  
(n=41)
